# Supplementary material for: CD26 Inhibition Potentiates the Therapeutic Effects of Human Umbilical Cord Blood-Derived Mesenchymal Stem Cells by Delaying Cellular Senescence
Source: Front Cell Dev Biol. 2022 Feb 1;9:803645. doi: 10.3389/fcell.2021.803645 (PMC8846329; doi:10.3389/fcell.2021.803645)
Supplement: Supplementary file 2 [file Table2.XLSX]

## Sheet: DEGs
PROBEID	SYMBOL	GENENAME	logFC	AveExpr	t	P.Value	adj.P.Val
16675158	PRG4	proteoglycan 4	4.2531	6.37358	35.6609	8.3502e-07	0.0190362
17059828	TFPI2	tissue factor pathway inhibitor 2	3.38569	9.5178	31.7877	1.41552e-06	0.0190362
16674845	LAMC2	laminin subunit gamma 2	3.37021	8.63045	31.4117	1.49493e-06	0.0190362
16667530	PALMD	palmdelphin	3.03907	8.96201	30.1315	1.80936e-06	0.0190362
16852179	SLC14A1	solute carrier family 14 member 1 (Kidd blood group)	2.80986	9.12248	26.3735	3.33202e-06	0.0218099
16844558	KRTAP1-5	keratin associated protein 1-5	2.41755	7.8988	24.0895	5.04439e-06	0.0218099
16984689	ITGA2	integrin subunit alpha 2	2.57322	9.28587	23.9196	5.21042e-06	0.0218099
16821541	CRISPLD2	cysteine rich secretory protein LCCL domain containing 2	-2.78486	8.84021	-22.6944	6.62689e-06	0.0218099
16887840	CDCA7	cell division cycle associated 7	-2.45975	6.54705	-21.3915	8.68248e-06	0.0218099
16947041	LOC105374160	uncharacterized LOC105374160	3.14796	6.89618	20.9384	9.57415e-06	0.0218099
16967831	EPGN	epithelial mitogen	2.24527	7.3974	20.1032	1.15289e-05	0.0218099
17013851	MYCT1	MYC target 1	2.43941	6.76789	20.1012	1.1534e-05	0.0218099
16947045	AADAC	arylacetamide deacetylase	2.27965	5.27528	19.3562	1.37019e-05	0.0218099
16725041	FAM111B	FAM111 trypsin like peptidase B	-2.37701	7.9546	-19.228	1.41234e-05	0.0218099
17016403	H3C8	H3 clustered histone 8	-2.00148	8.44434	-19.0505	1.47333e-05	0.0218099
17023658	MOXD1	monooxygenase DBH like 1	1.90257	9.27532	19.0267	1.48174e-05	0.0218099
17076726	PLAT	plasminogen activator, tissue type	2.32995	11.4256	19.0007	1.49098e-05	0.0218099
16967843	EREG	epiregulin	2.1734	9.5084	18.9946	1.49318e-05	0.0218099
16857886	ANGPTL4	angiopoietin like 4	2.17397	8.72675	18.9402	1.51282e-05	0.0218099
17016369	H2BC3	H2B clustered histone 3	-2.07723	8.68897	-18.6993	1.60369e-05	0.0218099
17066065	SLC7A2	solute carrier family 7 member 2	-1.9445	8.08262	-18.6803	1.61112e-05	0.0218099
17075776	PBK	PDZ binding kinase	-1.86226	9.07986	-18.2537	1.78987e-05	0.0218099
16904278	DPP4	dipeptidyl peptidase 4	2.77789	7.33784	18.0733	1.87264e-05	0.0218099
16702571	MCM10	minichromosome maintenance 10 replication initiation factor	-1.82868	7.56465	-17.9085	1.95238e-05	0.0218099
16850477	TYMS	thymidylate synthetase	-1.8529	9.49205	-17.9006	1.95629e-05	0.0218099
16848173	ABCA9	ATP binding cassette subfamily A member 9	2.30356	6.54028	17.8468	1.98327e-05	0.0218099
16722987	LUZP2	leucine zipper protein 2	-1.96845	8.36855	-17.8185	1.99766e-05	0.0218099
16925602	ERG	ETS transcription factor ERG	-2.0387	7.78774	-17.5924	2.11714e-05	0.0218099
16886717	GALNT5	polypeptide N-acetylgalactosaminyltransferase 5	1.83855	10.1089	17.3699	2.24337e-05	0.0218099
16719515	MKI67	marker of proliferation Ki-67	-1.83668	10.515	-17.3672	2.24492e-05	0.0218099
16988703	LMNB1	lamin B1	-1.97345	8.10199	-17.353	2.25328e-05	0.0218099
16777278	SKA3	spindle and kinetochore associated complex subunit 3	-1.77336	9.22152	-17.3226	2.27132e-05	0.0218099
16989636	KIF20A	kinesin family member 20A	-1.80298	9.43007	-17.3193	2.2733e-05	0.0218099
16947034	AADACP1	arylacetamide deacetylase pseudogene 1	1.95563	4.25816	17.1485	2.37806e-05	0.0218099
16694617	IQGAP3	IQ motif containing GTPase activating protein 3	-1.72285	8.29111	-17.1449	2.38038e-05	0.0218099
16737344	PAMR1	peptidase domain containing associated with muscle regeneration 1	1.85388	8.3391	16.9634	2.49835e-05	0.0218099
16705159	CDK1	cyclin dependent kinase 1	-1.70484	7.66726	-16.9197	2.52779e-05	0.0218099
16960054	PCOLCE2	procollagen C-endopeptidase enhancer 2	2.28376	7.73695	16.8522	2.5741e-05	0.0218099
16681827	DHRS3	dehydrogenase/reductase 3	2.32713	8.90335	16.81	2.60362e-05	0.0218099
16848219	ABCA6	ATP binding cassette subfamily A member 6	1.98039	5.90451	16.7828	2.62284e-05	0.0218099
17005589	H2AC8	H2A clustered histone 8	-1.79244	8.33909	-16.7647	2.63576e-05	0.0218099
16799793	NUSAP1	nucleolar and spindle associated protein 1	-1.72579	9.79053	-16.6221	2.74005e-05	0.0218099
16844572	KRTAP1-1	keratin associated protein 1-1	2.38606	7.99905	16.5673	2.78144e-05	0.0218099
16755498	TMPO	thymopoietin	-1.71393	8.56298	-16.5325	2.80811e-05	0.0218099
16707551	CEP55	centrosomal protein 55	-1.78428	9.43276	-16.448	2.87425e-05	0.0218099
16901755	BUB1	BUB1 mitotic checkpoint serine/threonine kinase	-1.68754	9.1762	-16.3331	2.96721e-05	0.0218099
16673154	NUF2	NUF2 component of NDC80 kinetochore complex	-1.66181	7.90395	-16.2878	3.00485e-05	0.0218099
16717272	LOXL4	lysyl oxidase like 4	2.16512	8.15455	16.2163	3.06543e-05	0.0218099
16922584	CHAF1B	chromatin assembly factor 1 subunit B	-1.61455	7.96048	-16.0137	3.2454e-05	0.0218099
16696425	TNFSF4	TNF superfamily member 4	2.06358	6.75596	15.9959	3.26191e-05	0.0218099
16960911	LXN	latexin	2.00037	8.48664	15.9742	3.28202e-05	0.0218099
16852312	SKA1	spindle and kinetochore associated complex subunit 1	-1.65676	8.9203	-15.8093	3.44022e-05	0.0218099
16951696	NEK10	NIMA related kinase 10	1.64149	7.35491	15.7415	3.50792e-05	0.0218099
16882975	NCAPH	non-SMC condensin I complex subunit H	-1.67291	9.34066	-15.7246	3.525e-05	0.0218099
16844312	TOP2A	DNA topoisomerase II alpha	-1.62864	10.4125	-15.7059	3.54407e-05	0.0218099
16766318	PRIM1	DNA primase subunit 1	-1.74909	8.10233	-15.7044	3.5456e-05	0.0218099
16979515	CCNA2	cyclin A2	-1.57193	10.4662	-15.6372	3.61524e-05	0.0218099
16697544	ASPM	assembly factor for spindle microtubules	-1.59242	9.5001	-15.6276	3.62534e-05	0.0218099
17121916	MIR924HG	MIR924 host gene	-2.20796	6.25429	-15.5442	3.71437e-05	0.0218099
16904152	PLA2R1	phospholipase A2 receptor 1	1.94468	9.62824	15.4784	3.78653e-05	0.0218099
16939960	KIF15	kinesin family member 15	-1.74072	8.10701	-15.4662	3.80009e-05	0.0218099
16951485	SGO1	shugoshin 1	-1.77551	8.92098	-15.4294	3.84134e-05	0.0218099
16978568	CENPE	centromere protein E	-1.61465	9.20079	-15.2973	3.9939e-05	0.0218099
16679411	EXO1	exonuclease 1	-1.67297	7.67682	-15.2589	4.03963e-05	0.0218099
16793225	DLGAP5	DLG associated protein 5	-1.6509	9.18059	-15.2438	4.05778e-05	0.0218099
16677201	DTL	denticleless E3 ubiquitin protein ligase homolog	-1.5294	10.0788	-15.1773	4.13892e-05	0.0218099
16688386	DEPDC1	DEP domain containing 1	-1.56954	8.61133	-15.1696	4.14854e-05	0.0218099
16707468	KIF11	kinesin family member 11	-1.728	9.80199	-15.157	4.16414e-05	0.0218099
16842673	SPAG5	sperm associated antigen 5	-1.66511	8.99655	-15.1499	4.17305e-05	0.0218099
16707695	HELLS	helicase, lymphoid specific	-1.61814	8.27314	-15.1459	4.17795e-05	0.0218099
16965346	NCAPG	non-SMC condensin I complex subunit G	-1.6331	9.94479	-15.1153	4.21646e-05	0.0218099
16707221	KIF20B	kinesin family member 20B	-1.57931	8.21119	-15.0067	4.35641e-05	0.0218099
16845794	KIF18B	kinesin family member 18B	-1.58994	9.1039	-14.9875	4.38169e-05	0.0218099
16901497	ST6GAL2	ST6 beta-galactoside alpha-2,6-sialyltransferase 2	-1.68756	7.54499	-14.9831	4.38756e-05	0.0218099
16697695	KIF14	kinesin family member 14	-1.7643	8.19155	-14.9829	4.38782e-05	0.0218099
16736638	E2F8	E2F transcription factor 8	-1.68398	7.76553	-14.937	4.4492e-05	0.0218099
16904425	GRB14	growth factor receptor bound protein 14	1.68152	7.90301	14.9139	4.48049e-05	0.0218099
16799598	KNL1	kinetochore scaffold 1	-1.76831	9.48725	-14.8602	4.5542e-05	0.0218099
16904780	SPC25	SPC25 component of NDC80 kinetochore complex	-1.73601	7.38925	-14.8251	4.60328e-05	0.0218099
16760048	FOXM1	forkhead box M1	-1.48518	9.42118	-14.8061	4.63007e-05	0.0218099
16938819	ARPP21	cAMP regulated phosphoprotein 21	1.64959	6.22634	14.7729	4.67731e-05	0.0218099
16913681	FAM83D	family with sequence similarity 83 member D	-1.55759	9.20567	-14.757	4.70018e-05	0.0218099
16817017	PLK1	polo like kinase 1	-1.57191	11.2236	-14.7501	4.71012e-05	0.0218099
16971573	MND1	meiotic nuclear divisions 1	-1.49285	6.92781	-14.746	4.71604e-05	0.0218099
17088462	PAPPA	pappalysin 1	1.4835	9.40709	14.6571	4.8468e-05	0.0221709
16800355	WDR76	WD repeat domain 76	-1.66782	8.80185	-14.5643	4.98811e-05	0.0225357
16840902	AURKB	aurora kinase B	-1.70692	9.60758	-14.5351	5.03364e-05	0.0225357
16689869	F3	coagulation factor III, tissue factor	1.74676	9.55584	14.4454	5.17647e-05	0.0228172
17064105	EZH2	enhancer of zeste 2 polycomb repressive complex 2 subunit	-1.7796	8.88332	-14.4279	5.20496e-05	0.0228172
16677425	CENPF	centromere protein F	-1.58749	8.97535	-14.38	5.2838e-05	0.0229241
17095887	ASPN	asporin	2.16942	7.32233	14.304	5.41197e-05	0.0230413
17008092	PIM1	Pim-1 proto-oncogene, serine/threonine kinase	-1.47284	7.84422	-14.2991	5.42031e-05	0.0230413
17016486	H2BC13	H2B clustered histone 13	-1.71415	7.28476	-14.1626	5.66041e-05	0.0235963
16805474	ARRDC4	arrestin domain containing 4	1.42228	8.14219	14.1506	5.68218e-05	0.0235963
16802519	KIF23	kinesin family member 23	-1.46778	9.73432	-14.1303	5.71908e-05	0.0235963
16937505	FANCD2	FA complementation group D2	-1.40514	8.36315	-14.0229	5.91966e-05	0.0238428
16957951	POLQ	DNA polymerase theta	-1.45551	7.49226	-14.0143	5.9361e-05	0.0238428
16758336	KNTC1	kinetochore associated 1	-1.45855	8.64939	-13.993	5.97707e-05	0.0238428
16991859	HMMR	hyaluronan mediated motility receptor	-1.43699	7.64968	-13.9783	6.00545e-05	0.0238428
16901957	CKAP2L	cytoskeleton associated protein 2 like	-1.45701	10.262	-13.8864	6.1871e-05	0.0241361
16889627	SNORD70	small nucleolar RNA, C/D box 70	-1.79582	4.36446	-13.8782	6.20352e-05	0.0241361
16852871	SERPINB2	serpin family B member 2	2.39342	7.88771	13.8546	6.2514e-05	0.0241361
16871467	HSPB6	heat shock protein family B (small) member 6	1.46191	10.7888	13.7665	6.4341e-05	0.0241439
16785155	SYNE2	spectrin repeat containing nuclear envelope protein 2	-1.60415	6.56574	-13.6992	6.57791e-05	0.0241439
16949792	FAM43A	family with sequence similarity 43 member A	1.77195	9.3318	13.6943	6.58865e-05	0.0241439
17079293	CCNE2	cyclin E2	-1.83058	7.70865	-13.6898	6.5984e-05	0.0241439
16931384	GTSE1	G2 and S-phase expressed 1	-1.51861	8.54572	-13.6601	6.66333e-05	0.0241439
17122270	POU3F3	POU class 3 homeobox 3	1.43611	5.01916	13.5792	6.84442e-05	0.0241439
16919044	RBL1	RB transcriptional corepressor like 1	-1.62456	8.34816	-13.5642	6.87857e-05	0.0241439
16979800	PCDH10-DT	PCDH10 divergent transcript	1.37062	8.54192	13.5617	6.88419e-05	0.0241439
16663514	CDC20	cell division cycle 20	-1.56572	10.1873	-13.5616	6.88448e-05	0.0241439
16798801	ARHGAP11B	Rho GTPase activating protein 11B	-1.71284	9.53853	-13.4457	7.15624e-05	0.0248641
16798919	ARHGAP11A	Rho GTPase activating protein 11A	-1.6069	9.39068	-13.4242	7.20803e-05	0.0248641
16687188	ORC1	origin recognition complex subunit 1	-1.66566	7.27609	-13.3876	7.29743e-05	0.0248998
17123646	EVA1C	eva-1 homolog C	1.46185	8.32466	13.3576	7.37148e-05	0.0248998
17005396	GMNN	geminin DNA replication inhibitor	-1.66873	8.29807	-13.3478	7.39588e-05	0.0248998
16804631	TICRR	TOPBP1 interacting checkpoint and replication regulator	-1.93395	8.66361	-13.2193	7.7255e-05	0.0249892
16813342	PRC1	protein regulator of cytokinesis 1	-1.40349	9.84037	-13.1938	7.79302e-05	0.0249892
16996545	DEPDC1B	DEP domain containing 1B	-1.60173	7.72477	-13.1923	7.79695e-05	0.0249892
17064679	XRCC2	X-ray repair cross complementing 2	-1.39799	8.57383	-13.1265	7.9746e-05	0.0249892
16792519	POLE2	DNA polymerase epsilon 2, accessory subunit	-1.37213	7.95579	-13.1168	8.00121e-05	0.0249892
16964000	TACC3	transforming acidic coiled-coil containing protein 3	-1.32587	7.7604	-13.0098	8.30196e-05	0.0249892
16912192	GINS1	GINS complex subunit 1	-1.31715	9.55503	-12.9764	8.39866e-05	0.0249892
16972616	NEIL3	nei like DNA glycosylase 3	-1.55336	8.22542	-12.9702	8.41666e-05	0.0249892
16747014	RAD51AP1	RAD51 associated protein 1	-1.31913	7.62527	-12.9697	8.41807e-05	0.0249892
16751709	ESPL1	extra spindle pole bodies like 1, separase	-1.31354	7.52443	-12.9148	8.58028e-05	0.0249892
16803562	CHRNA5	cholinergic receptor nicotinic alpha 5 subunit	-1.66954	7.64974	-12.8944	8.64171e-05	0.0249892
16951293	MIR3134	microRNA 3134	-1.49866	3.67858	-12.8797	8.68625e-05	0.0249892
16943230	LOC105374003	uncharacterized LOC105374003	1.66032	6.69604	12.8655	8.72938e-05	0.0249892
17083971	IFNA1	interferon alpha 1	1.8441	5.03088	12.8648	8.73155e-05	0.0249892
17049904	LRRC17	leucine rich repeat containing 17	1.4238	9.64971	12.8394	8.80935e-05	0.0249892
16976615	SULT1E1	sulfotransferase family 1E member 1	-1.60936	9.78592	-12.8363	8.81911e-05	0.0249892
16773840	BRCA2	BRCA2 DNA repair associated	-1.69247	8.17857	-12.8003	8.93107e-05	0.0249892
17064939	NCAPG2	non-SMC condensin II complex subunit G2	-1.29364	8.49705	-12.7532	9.08072e-05	0.0249892
17024980	FBXO5	F-box protein 5	-1.44636	7.43317	-12.7387	9.12709e-05	0.0249892
17010552	TTK	TTK protein kinase	-1.39742	8.4103	-12.7184	9.19301e-05	0.0249892
17016043	MBOAT1	membrane bound O-acyltransferase domain containing 1	-1.80015	6.1671	-12.7012	9.24893e-05	0.0249892
16714998	DNA2	DNA replication helicase/nuclease 2	-1.4677	7.93806	-12.6953	9.2685e-05	0.0249892
16778703	KCTD4	potassium channel tetramerization domain containing 4	1.44224	5.59308	12.689	9.28895e-05	0.0249892
17016499	H1-5	H1.5 linker histone, cluster member	-1.95536	8.61316	-12.6807	9.3164e-05	0.0249892
16760953	MFAP5	microfibril associated protein 5	1.383	8.98231	12.6629	9.37559e-05	0.0249892
16663958	KIF2C	kinesin family member 2C	-1.6335	7.86987	-12.6463	9.43089e-05	0.0249892
16844804	KRT14	keratin 14	1.958	6.36125	12.6397	9.45299e-05	0.0249892
17124314	STXBP5-AS1	STXBP5 antisense RNA 1	1.30582	5.26773	12.6307	9.48335e-05	0.0249892
16826160	SHCBP1	SHC binding and spindle associated 1	-1.39429	9.31419	-12.6205	9.51803e-05	0.0249892
17125782	MILR1	mast cell immunoglobulin like receptor 1	1.61625	6.93416	12.6152	9.536e-05	0.0249892
17045198	ANLN	anillin actin binding protein	-1.51237	11.1836	-12.6064	9.56576e-05	0.0249892
16692636	H2AC21	H2A clustered histone 21	-1.30569	11.6607	-12.5655	9.70664e-05	0.0250393
17101214	XG	Xg glycoprotein (Xg blood group)	1.27721	7.94725	12.5422	9.788e-05	0.0250393
16906615	CAVIN2	caveolae associated protein 2	1.6833	7.03908	12.4968	9.94894e-05	0.0250393
16750761	TROAP	trophinin associated protein	-1.50931	7.41752	-12.496	9.95189e-05	0.0250393
16772405	TMEM132D	transmembrane protein 132D	-1.48171	7.47148	-12.4629	0.000100711	0.0250393
16857258	UHRF1	ubiquitin like with PHD and ring finger domains 1	-1.30469	9.68506	-12.4599	0.000100818	0.0250393
16775014	CKAP2	cytoskeleton associated protein 2	-1.30304	9.51755	-12.4554	0.000100985	0.0250393
16970563	PLK4	polo like kinase 4	-1.86181	7.49895	-12.4454	0.000101347	0.0250393
16736891	KIF18A	kinesin family member 18A	-1.29986	8.73989	-12.4292	0.000101945	0.0250393
16714747	RTKN2	rhotekin 2	-1.40883	7.35141	-12.4108	0.000102624	0.0250393
16819678	GINS3	GINS complex subunit 3	-1.31829	7.92055	-12.3743	0.000103991	0.0250393
16927052	CDC45	cell division cycle 45	-1.5297	8.32388	-12.3494	0.000104935	0.0250393
17084904	MELK	maternal embryonic leucine zipper kinase	-1.37733	9.27802	-12.3378	0.000105378	0.0250393
17058968	FGL2	fibrinogen like 2	1.33287	6.94567	12.3373	0.0001054	0.0250393
16844591	KRTAP4-8	keratin associated protein 4-8	1.71967	8.8749	12.3327	0.000105575	0.0250393
16957170	CIP2A	cellular inhibitor of PP2A	-1.32852	8.73811	-12.3226	0.000105965	0.0250393
17067332	ESCO2	establishment of sister chromatid cohesion N-acetyltransferase 2	-1.70932	6.87372	-12.2946	0.000107055	0.0250393
16909021	SERPINE2	serpin family E member 2	1.36983	8.96093	12.2935	0.000107097	0.0250393
16683264	HTR1D	5-hydroxytryptamine receptor 1D	-1.24811	6.17376	-12.2658	0.000108186	0.0251542
17019805	TNFRSF21	TNF receptor superfamily member 21	1.87707	9.70754	12.2071	0.00011054	0.0251862
17104484	KIF4A	kinesin family member 4A	-1.44865	8.76018	-12.2047	0.000110639	0.0251862
16922028	BACH1-IT2	BACH1 intronic transcript 2	-1.31877	6.60669	-12.1922	0.000111149	0.0251862
17105401	CENPI	centromere protein I	-1.37445	9.1775	-12.1835	0.000111508	0.0251862
17055603	MIR1302-6	microRNA 1302-6	1.49639	3.53718	12.1458	0.000113067	0.0251862
16893349	SNED1	sushi, nidogen and EGF like domains 1	1.67153	7.83583	12.1127	0.00011446	0.0251862
16849697	NPTX1	neuronal pentraxin 1	1.69147	7.41728	12.0997	0.000115014	0.0251862
17005582	H2BC7	H2B clustered histone 7	-1.35452	6.47625	-12.0943	0.000115243	0.0251862
16986065	TMEM171	transmembrane protein 171	1.31915	9.05611	12.0834	0.000115711	0.0251862
16913957	MYBL2	MYB proto-oncogene like 2	-1.88748	9.2641	-12.0812	0.000115808	0.0251862
17080082	ANGPT1	angiopoietin 1	1.43625	6.67626	12.0808	0.000115825	0.0251862
16947556	SMC4	structural maintenance of chromosomes 4	-1.33926	9.13626	-12.0515	0.000117094	0.0251862
16895941	FNDC4	fibronectin type III domain containing 4	1.43494	10.0953	12.0484	0.000117226	0.0251862
16850517	NDC80	NDC80 kinetochore complex component	-1.80793	8.86217	-12.0342	0.000117851	0.0251862
16779839	KCTD12	potassium channel tetramerization domain containing 12	1.30994	9.36719	12.0262	0.000118203	0.0251862
16879500	PLEKHH2	pleckstrin homology, MyTH4 and FERM domain containing H2	1.37631	7.34705	12.0195	0.000118498	0.0251862
16665447	USP1	ubiquitin specific peptidase 1	-1.20227	9.2597	-11.9007	0.000123893	0.0254188
17027710	TCF19	transcription factor 19	-1.25935	8.01805	-11.8894	0.000124424	0.0254188
16985614	CENPH	centromere protein H	-1.22709	6.93775	-11.8567	0.00012597	0.0256102
16804902	BLM	BLM RecQ like helicase	-1.49537	7.85795	-11.788	0.000129295	0.0258231
17050834	WNT16	Wnt family member 16	1.40979	6.77476	11.7837	0.000129502	0.0258231
16815090	CCNF	cyclin F	-1.257	8.23503	-11.7808	0.000129647	0.0258231
16878297	GCKR	glucokinase regulator	1.45877	7.0416	11.765	0.00013043	0.0258231
16909700	HJURP	Holliday junction recognition protein	-1.50469	9.89062	-11.7596	0.000130699	0.0258231
17122576	LINC00607	long intergenic non-protein coding RNA 607	1.43349	6.67814	11.7387	0.000131744	0.0259081
16767422	PTPRB	protein tyrosine phosphatase receptor type B	1.22063	7.25174	11.7023	0.000133587	0.0260116
17007459	KIFC1	kinesin family member C1	-1.41649	8.38338	-11.6784	0.000134819	0.0260116
16686796	STIL	STIL centriolar assembly protein	-1.22151	9.50979	-11.6647	0.000135529	0.0260116
17110071	SRPX	sushi repeat containing protein X-linked	1.32022	9.08909	11.6078	0.000138526	0.0262601
16908197	IGFBP5	insulin like growth factor binding protein 5	1.2118	10.706	11.5508	0.000141614	0.0267249
16870925	ZNF724	zinc finger protein 724	-1.21477	6.47885	-11.5076	0.000144007	0.0270509
16839425	SLC43A2	solute carrier family 43 member 2	1.24362	7.5808	11.4694	0.00014617	0.0270509
17082362	EPPK1	epiplakin 1	-1.3003	5.75752	-11.4681	0.000146243	0.0270509
16962316	LIPH	lipase H	2.21795	5.94274	11.4659	0.000146369	0.0270509
16834056	CDC6	cell division cycle 6	-1.84828	8.87609	-11.4626	0.000146555	0.0270509
16716403	SLC16A12	solute carrier family 16 member 12	1.4213	6.1936	11.4223	0.000148881	0.0271973
17016400	H3C7	H3 clustered histone 7	-1.27783	7.16668	-11.4143	0.00014935	0.0271973
16829369	FANCA	FA complementation group A	-1.35022	8.28844	-11.4122	0.000149475	0.0271973
17005858	H2AC13	H2A clustered histone 13	-2.2082	8.22754	-11.4	0.000150192	0.0271973
17059119	SEMA3C	semaphorin 3C	1.33647	10.3555	11.3901	0.000150776	0.0271973
16961162	SLITRK3	SLIT and NTRK like family member 3	-1.17319	8.38498	-11.3397	0.000153792	0.0274213
16990267	PCDHB5	protocadherin beta 5	1.264	5.7532	11.3197	0.000155014	0.0274213
16712879	SVIL	supervillin	1.21203	7.31625	11.2872	0.000157017	0.0275417
17083261	SLC1A1	solute carrier family 1 member 1	1.15293	9.47321	11.2864	0.000157067	0.0275417
16755692	GAS2L3	growth arrest specific 2 like 3	-1.47734	8.65643	-11.2621	0.000158588	0.0276793
16960922	RARRES1	retinoic acid receptor responder 1	1.27786	6.4981	11.2529	0.000159167	0.0276793
16699877	LBR	lamin B receptor	-1.20121	8.56018	-11.1843	0.000163576	0.0281006
17045078	BMPER	BMP binding endothelial regulator	1.68473	9.61259	11.18	0.000163862	0.0281006
16832852	ATAD5	ATPase family AAA domain containing 5	-1.3759	7.96501	-11.1769	0.000164063	0.0281006
17092879	MIR31	microRNA 31	1.21555	10.0743	11.1481	0.000165967	0.0281006
16962493	RFC4	replication factor C subunit 4	-1.26517	8.93551	-11.1441	0.000166231	0.0281006
17068782	MCM4	minichromosome maintenance complex component 4	-1.20276	9.50089	-11.1436	0.000166264	0.0281006
16970762	PCDH10	protocadherin 10	1.15489	10.7474	11.123	0.000167646	0.0281354
17121990	ZNF730	zinc finger protein 730	-1.99358	6.83797	-11.1206	0.000167807	0.0281354
16743432	SESN3	sestrin 3	1.15542	7.01612	11.0903	0.000169859	0.0282572
16914315	UBE2C	ubiquitin conjugating enzyme E2 C	-1.44431	7.99511	-11.0901	0.000169876	0.0282572
17093397	KIF24	kinesin family member 24	-1.1186	7.33421	-11.0506	0.000172603	0.0285977
16668079	GPSM2	G protein signaling modulator 2	-1.11868	8.25084	-10.9847	0.000177274	0.028787
16667702	VCAM1	vascular cell adhesion molecule 1	-1.36659	6.72762	-10.9767	0.000177849	0.028787
16985599	CCNB1	cyclin B1	-1.40566	8.77037	-10.9611	0.000178985	0.0288598
16801557	CCNB2	cyclin B2	-1.51618	10.1402	-10.9423	0.000180356	0.0289698
16777502	CENPJ	centromere protein J	-1.0946	7.65375	-10.9286	0.000181367	0.0289787
16847432	BRIP1	BRCA1 interacting helicase 1	-1.5316	9.99649	-10.9229	0.000181788	0.0289787
16996722	CENPK	centromere protein K	-1.24636	8.81573	-10.8631	0.0001863	0.0292547
17050797	CPED1	cadherin like and PC-esterase domain containing 1	1.22704	8.42904	10.7817	0.000192655	0.0301401
16664569	CDKN2C	cyclin dependent kinase inhibitor 2C	-1.34098	6.84273	-10.7681	0.000193739	0.0301975
16952769	CDCP1	CUB domain containing protein 1	1.13367	8.48082	10.7485	0.000195316	0.0302313
16978779	DKK2	dickkopf WNT signaling pathway inhibitor 2	-1.19099	9.29086	-10.7418	0.00019586	0.0302313
17110404	SLC9A7	solute carrier family 9 member A7	1.28503	10.3795	10.7387	0.000196111	0.0302313
16804559	FANCI	FA complementation group I	-1.34905	8.98781	-10.6974	0.00019951	0.0305469
17102230	POLA1	DNA polymerase alpha 1, catalytic subunit	-1.09711	8.29208	-10.6962	0.00019961	0.0305469
16856216	HCN2	hyperpolarization activated cyclic nucleotide gated potassium and sodium channel 2	1.10031	6.65734	10.6652	0.000202204	0.0307205
16716507	PPP1R3C	protein phosphatase 1 regulatory subunit 3C	1.07004	9.02595	10.6216	0.000205927	0.0310667
17020019	MCM3	minichromosome maintenance complex component 3	-1.19307	9.36995	-10.6149	0.000206509	0.0310667
16981506	HMGB2	high mobility group box 2	-1.19594	7.0407	-10.6127	0.000206698	0.0310667
17072225	MTBP	MDM2 binding protein	-1.09941	6.48588	-10.598	0.000207978	0.0311479
16907912	IKZF2	IKAROS family zinc finger 2	1.13947	6.98888	10.5649	0.000210898	0.0311763
16721280	TRIM22	tripartite motif containing 22	1.11264	8.15544	10.5644	0.000210935	0.0311763
16953279	CDC25A	cell division cycle 25A	-1.09238	7.45779	-10.5622	0.000211131	0.0311763
17016356	H1-1	H1.1 linker histone, cluster member	-1.07155	6.77632	-10.5512	0.000212115	0.031212
17059776	SAMD9L	sterile alpha motif domain containing 9 like	1.08584	8.73671	10.5316	0.000213876	0.0312526
16877507	LOC105373456	uncharacterized LOC105373456	1.66324	6.697	10.4935	0.00021736	0.0315277
16938562	TGFBR2	transforming growth factor beta receptor 2	1.07703	11.1094	10.4811	0.0002185	0.0315277
16883498	NPAS2	neuronal PAS domain protein 2	1.15652	8.36135	10.4575	0.000220703	0.0316999
16964050	NSD2	nuclear receptor binding SET domain protein 2	-1.08981	8.97446	-10.4088	0.000225335	0.0321465
16773946	RFC3	replication factor C subunit 3	-1.1088	9.91709	-10.4087	0.00022534	0.0321465
16992122	DOCK2	dedicator of cytokinesis 2	-1.19646	6.12964	-10.3894	0.000227212	0.032304
16869588	ASF1B	anti-silencing function 1B histone chaperone	-1.32776	9.19909	-10.363	0.000229793	0.032479
16830173	PIMREG	PICALM interacting mitotic regulator	-1.74854	8.36312	-10.361	0.000229989	0.032479
16810543	PCLAF	PCNA clamp associated factor	-1.26198	7.69268	-10.3533	0.000230758	0.032479
17070381	LRRCC1	leucine rich repeat and coiled-coil centrosomal protein 1	-1.27036	5.99166	-10.3429	0.000231784	0.0325147
17013657	ULBP1	UL16 binding protein 1	1.59489	7.71023	10.3098	0.000235114	0.0327454
16784299	CDKN3	cyclin dependent kinase inhibitor 3	-1.37466	8.82419	-10.302	0.00023591	0.0327454
16677221	MIR3122	microRNA 3122	-1.12201	6.09712	-10.2972	0.000236396	0.0327454
17121224	LINC01583	long intergenic non-protein coding RNA 1583	-1.38244	6.71902	-10.2849	0.000237649	0.0327454
16669212	TTF2	transcription termination factor 2	-1.21625	7.51526	-10.2825	0.000237902	0.0327454
17005560	H4C3	H4 clustered histone 3	-1.12609	10.8494	-10.2501	0.000241256	0.0330718
17067102	CDCA2	cell division cycle associated 2	-1.31846	8.87919	-10.2283	0.000243554	0.0331522
16889054	CCDC150	coiled-coil domain containing 150	-1.03641	5.88906	-10.2163	0.000244828	0.0331522
16853879	PIEZO2	piezo type mechanosensitive ion channel component 2	-1.10743	7.36519	-10.215	0.000244966	0.0331522
16990312	PCDHB13	protocadherin beta 13	1.46382	4.74388	10.2147	0.000244994	0.0331522
16870443	CRLF1	cytokine receptor like factor 1	1.4053	8.55785	10.207	0.000245812	0.0331563
16828886	GINS2	GINS complex subunit 2	-1.78415	8.98318	-10.1723	0.00024956	0.0331667
16907960	BARD1	BRCA1 associated RING domain 1	-1.08487	8.28941	-10.1679	0.000250036	0.0331667
16662648	CDCA8	cell division cycle associated 8	-1.60349	9.16937	-10.1678	0.000250051	0.0331667
17112925	NXF3	nuclear RNA export factor 3	1.2345	6.17374	10.1658	0.000250275	0.0331667
16698984	NEK2	NIMA related kinase 2	-1.32141	8.15642	-10.1626	0.000250618	0.0331667
16990321	PCDHB14	protocadherin beta 14	1.14098	6.28091	10.1097	0.000256497	0.0336586
17077826	MYBL1	MYB proto-oncogene like 1	-1.16987	9.23646	-10.1076	0.000256734	0.0336586
16836492	PRR11	proline rich 11	-1.06193	10.4387	-10.1001	0.00025758	0.0336645
17088159	FAM225A	family with sequence similarity 225 member A	1.06357	8.17812	10.0768	0.000260227	0.0339052
16887237	DHRS9	dehydrogenase/reductase 9	1.13494	5.49201	10.0543	0.000262824	0.0340223
17079588	FBXO43	F-box protein 43	-1.05103	4.52571	-10.0472	0.000263647	0.0340223
17070120	CRISPLD1	cysteine rich secretory protein LCCL domain containing 1	-1.03846	7.13236	-10.0411	0.000264359	0.0340223
16889251	SGO2	shugoshin 2	-1.25545	7.33945	-10.0285	0.000265833	0.0341077
17005593	H3C6	H3 clustered histone 6	-1.09038	12.3923	-10.0148	0.000267453	0.0341329
17047965	DBF4	DBF4 zinc finger	-1.08398	7.57256	-10.004	0.000268732	0.0341495
17007824	FANCE	FA complementation group E	-1.13484	7.98263	-9.99837	0.000269405	0.0341495
17092870	MIR31HG	MIR31 host gene	1.00163	10.4027	9.97999	0.000271611	0.0343258
16762661	PTHLH	parathyroid hormone like hormone	1.05563	6.33059	9.96481	0.000273451	0.0344548
16916958	PCNA	proliferating cell nuclear antigen	-1.17051	9.64057	-9.94183	0.000276263	0.0346462
16685165	CLSPN	claspin	-1.68263	7.49761	-9.93897	0.000276617	0.0346462
16849379	TK1	thymidine kinase 1	-1.37119	9.95976	-9.92991	0.000277737	0.0346833
17075553	STC1	stanniocalcin 1	1.00177	10.6592	9.86421	0.000286026	0.03548
16779157	DLEU2	deleted in lymphocytic leukemia 2	-1.01062	5.86526	-9.85939	0.000286646	0.03548
17106997	STK26	serine/threonine kinase 26	-1.49889	7.17827	-9.8471	0.000288234	0.035572
16961003	TRIM59	tripartite motif containing 59	-1.0457	7.48146	-9.83297	0.000290072	0.0356708
16868158	RAB11B-AS1	RAB11B antisense RNA 1	1.03737	6.33176	9.82794	0.00029073	0.0356708
16668997	OLFML3	olfactomedin like 3	-1.38291	7.63688	-9.80416	0.000293866	0.0358444
17043843	TSPAN13	tetraspanin 13	1.20169	7.94143	9.79709	0.000294806	0.0358444
17101517	PRPS2	phosphoribosyl pyrophosphate synthetase 2	-1.00693	9.99865	-9.7915	0.000295552	0.0358444
16982024	CENPU	centromere protein U	-1.16321	8.42125	-9.78377	0.000296587	0.0358666
16879883	MSH2	mutS homolog 2	-1.06616	7.91611	-9.75273	0.000300788	0.0359414
16766403	NEMP1	nuclear envelope integral membrane protein 1	-1.05836	9.23018	-9.72017	0.000305272	0.0359414
16877019	RRM2	ribonucleotide reductase regulatory subunit M2	-1.4375	8.74672	-9.70201	0.000307808	0.0359414
17120692	LOC408186	alpha-2-macroglobulin like 1 pseudogene	-1.3398	4.47012	-9.69741	0.000308453	0.0359414
16807605	OIP5	Opa interacting protein 5	-1.23229	7.59456	-9.69525	0.000308759	0.0359414
16877473	GEN1	GEN1 Holliday junction 5' flap endonuclease	-1.08495	8.44216	-9.69504	0.000308788	0.0359414
16844585	KRTAP2-3	keratin associated protein 2-3	1.34157	11.7534	9.69376	0.000308969	0.0359414
16699739	PARP1	poly(ADP-ribose) polymerase 1	-1.00593	9.09729	-9.69326	0.000309039	0.0359414
17080516	ENPP2	ectonucleotide pyrophosphatase/phosphodiesterase 2	1.39974	9.45446	9.68586	0.000310084	0.0359414
16752305	CDK2	cyclin dependent kinase 2	-1.00416	9.73257	-9.68022	0.000310885	0.0359414
16970647	LINC02615	long intergenic non-protein coding RNA 2615	1.06683	6.94104	9.62031	0.000319537	0.0363949
16851259	ANKRD30B	ankyrin repeat domain 30B	-1.05245	6.28916	-9.61728	0.000319982	0.0363949
16664118	NASP	nuclear autoantigenic sperm protein	-1.14839	7.29141	-9.58303	0.000325067	0.0366759
16793190	WDHD1	WD repeat and HMG-box DNA binding protein 1	-1.11813	8.47609	-9.56579	0.000327664	0.0368701
17024002	MTFR2	mitochondrial fission regulator 2	-1.31206	6.13406	-9.5512	0.000329882	0.0370207
16792710	MIR4504	microRNA 4504	-1.30289	5.30252	-9.5155	0.000335384	0.0372219
17021845	MMS22L	MMS22 like, DNA repair protein	-1.1912	7.54501	-9.51469	0.000335511	0.0372219
16675398	CFH	complement factor H	1.5172	8.94594	9.47688	0.000341462	0.0375558
17060412	MCM7	minichromosome maintenance complex component 7	-1.48992	9.25014	-9.47188	0.000342259	0.0375558
17015637	ELOVL2	ELOVL fatty acid elongase 2	-1.08364	6.05047	-9.46212	0.00034382	0.0375558
16919158	TGM2	transglutaminase 2	1.06029	11.4174	9.45214	0.000345426	0.0375558
16903090	MCM6	minichromosome maintenance complex component 6	-1.01215	8.77678	-9.44778	0.00034613	0.0375558
16912379	TPX2	TPX2 microtubule nucleation factor	-1.02167	11.267	-9.44703	0.000346251	0.0375558
16690067	SASS6	SAS-6 centriolar assembly protein	-1.06739	8.65931	-9.43348	0.000348452	0.0376973
16952782	TMEM158	transmembrane protein 158	1.08922	9.39733	9.40555	0.000353041	0.0380958
17105332	SRPX2	sushi repeat containing protein X-linked 2	1.04826	9.29589	9.37379	0.000358349	0.0383734
17121186	STARD9	StAR related lipid transfer domain containing 9	-1.19365	7.09983	-9.35967	0.00036074	0.0384785
16772625	POLE	DNA polymerase epsilon, catalytic subunit	-1.04451	7.98732	-9.35721	0.000361159	0.0384785
17005865	H2BC14	H2B clustered histone 14	-1.11537	12.8687	-9.34086	0.000363954	0.038502
16828550	ADAMTS18	ADAM metallopeptidase with thrombospondin type 1 motif 18	1.45883	6.70607	9.32425	0.000366821	0.038502
16721835	WEE1	WEE1 G2 checkpoint kinase	-1.26496	9.42607	-9.31392	0.000368618	0.038502
16703478	MASTL	microtubule associated serine/threonine kinase like	-1.22721	9.66403	-9.31115	0.000369103	0.038502
16746992	CCND2	cyclin D2	1.06905	5.70755	9.30013	0.000371036	0.038502
16761617	MANSC1	MANSC domain containing 1	1.08421	8.36819	9.2971	0.000371568	0.038502
16702257	LINC00707	long intergenic non-protein coding RNA 707	-1.51862	6.66701	-9.29672	0.000371636	0.038502
16978354	EMCN	endomucin	1.54281	6.18354	9.29645	0.000371682	0.038502
17096205	ZNF367	zinc finger protein 367	-1.39091	7.32428	-9.27227	0.000375975	0.0386859
17106688	GRIA3	glutamate ionotropic receptor AMPA type subunit 3	1.02784	7.4222	9.26094	0.000378005	0.0387427
16829570	SERPINF1	serpin family F member 1	1.11736	8.56077	9.25318	0.000379405	0.0387546
16943789	CD96	CD96 molecule	1.41014	5.19274	9.24095	0.000381622	0.0388497
16837348	MAP2K6	mitogen-activated protein kinase kinase 6	-1.2301	5.34721	-9.23787	0.000382183	0.0388497
16991741	PTTG1	PTTG1 regulator of sister chromatid separation, securin	-1.19081	6.94304	-9.22119	0.000385238	0.0389427
17008341	DAAM2	dishevelled associated activator of morphogenesis 2	-1.06091	7.85529	-9.21701	0.000386008	0.0389427
16690704	SLC16A4	solute carrier family 16 member 4	1.14861	8.8628	9.20468	0.000388291	0.0389427
16979389	MAD2L1	mitotic arrest deficient 2 like 1	-1.3635	7.63903	-9.16009	0.000396683	0.0395593
16861318	WDR62	WD repeat domain 62	-1.13135	7.68206	-9.15072	0.000398474	0.0396439
16664243	RAD54L	RAD54 like	-1.48231	7.30868	-9.13152	0.000402176	0.0397055
17063221	FAM180A	family with sequence similarity 180 member A	1.022	7.0153	9.12958	0.000402551	0.0397055
16845172	PSMC3IP	PSMC3 interacting protein	-1.0974	7.46436	-9.12252	0.000403924	0.0397055
16842103	SHMT1	serine hydroxymethyltransferase 1	-1.06948	7.06316	-9.12121	0.00040418	0.0397055
16890675	IGFBP2	insulin like growth factor binding protein 2	1.16621	7.14921	9.08672	0.000410973	0.0399906
17002052	FAXDC2	fatty acid hydroxylase domain containing 2	1.14682	6.87993	9.08391	0.000411533	0.0399906
16848123	ABCA8	ATP binding cassette subfamily A member 8	1.29642	8.42351	9.07229	0.000413857	0.0399906
16838359	BIRC5	baculoviral IAP repeat containing 5	-1.45166	8.07804	-9.07003	0.000414312	0.0399906
17000724	HBEGF	heparin binding EGF like growth factor	-1.04446	9.18903	-9.0504	0.000418278	0.0400455
16811246	LINC02204	long intergenic non-protein coding RNA 2204	1.0054	7.49705	9.01725	0.000425081	0.040519
16985217	RNF180	ring finger protein 180	-1.10225	6.12064	-8.96995	0.000435023	0.0411404
16991180	SMIM3	small integral membrane protein 3	1.63548	8.0022	8.94825	0.000439676	0.0414446
17122142	CD177	CD177 molecule	1.85667	4.26301	8.90875	0.000448305	0.0418576
16829764	HASPIN	histone H3 associated protein kinase	-1.3803	7.93745	-8.90753	0.000448574	0.0418576
16732960	CCDC15	coiled-coil domain containing 15	-1.06535	6.8055	-8.89731	0.000450841	0.0418834
16753228	ATP23	ATP23 metallopeptidase and ATP synthase assembly factor homolog	-1.02117	8.74418	-8.86343	0.000458455	0.0422795
16817647	KIF22	kinesin family member 22	-1.18514	9.06489	-8.86049	0.000459123	0.0422795
17009482	CENPQ	centromere protein Q	-1.04315	7.69007	-8.84854	0.000461852	0.0423455
16859795	GDF15	growth differentiation factor 15	1.03299	9.3344	8.80434	0.000472111	0.0428196
17062321	CADPS2	calcium dependent secretion activator 2	-1.17648	5.26153	-8.77752	0.000478471	0.0432102
16743751	MMP12	matrix metallopeptidase 12	1.14077	5.51578	8.77297	0.00047956	0.0432159
16733104	CHEK1	checkpoint kinase 1	-1.02146	8.61906	-8.76071	0.000482511	0.0433142
16745281	MCAM	melanoma cell adhesion molecule	-1.023	7.96436	-8.75989	0.000482709	0.0433142
16692724	ANP32E	acidic nuclear phosphoprotein 32 family member E	-1.13118	9.34091	-8.75257	0.00048448	0.0433806
16778553	LINC00428	long intergenic non-protein coding RNA 428	1.32757	3.50087	8.71158	0.000494552	0.0440948
17012804	MYB	MYB proto-oncogene, transcription factor	-1.15038	6.83669	-8.65793	0.00050812	0.0447935
16945101	MCM2	minichromosome maintenance complex component 2	-1.18016	7.89269	-8.63748	0.000513409	0.0451071
16963845	IDUA	alpha-L-iduronidase	1.00391	7.93299	8.62013	0.000517947	0.045411
16890556	LINC01614	long intergenic non-protein coding RNA 1614	-1.3155	10.6239	-8.5533	0.000535893	0.0466926
16747287	NCAPD2	non-SMC condensin I complex subunit D2	-1.01483	9.90494	-8.54143	0.000539157	0.0468206
16918445	E2F1	E2F transcription factor 1	-1.27052	8.67045	-8.53987	0.000539588	0.0468206
16831224	MYOCD	myocardin	-1.08539	8.86059	-8.53476	0.000541002	0.0468468
16705283	LINC01515	long intergenic non-protein coding RNA 1515	-1.00725	9.81477	-8.49915	0.000550983	0.0469698
16837391	KCNJ2	potassium inwardly rectifying channel subfamily J member 2	1.24657	6.74346	8.49785	0.000551352	0.0469698
17086634	CKS2	CDC28 protein kinase regulatory subunit 2	-1.06184	11.2071	-8.46854	0.000559742	0.0473968
17016490	H2AC14	H2A clustered histone 14	-1.42983	4.24957	-8.42401	0.000572784	0.0480899
16966855	KIT	KIT proto-oncogene, receptor tyrosine kinase	1.35087	6.71426	8.41402	0.000575759	0.0480899
17012379	CENPW	centromere protein W	-1.12039	7.28047	-8.40783	0.000577614	0.0481019
17020995	HTR1B	5-hydroxytryptamine receptor 1B	-1.20747	6.29116	-8.38783	0.000583651	0.0481989
17016379	H2BC4	H2B clustered histone 4	1.1689	6.22149	8.37946	0.000586199	0.0481989
17109211	FANCB	FA complementation group B	-1.42084	8.20916	-8.37366	0.000587975	0.0481989
16835158	ITGB3	integrin subunit beta 3	-1.01012	9.85216	-8.37076	0.000588863	0.0481989
16697492	KCNT2	potassium sodium-activated channel subfamily T member 2	1.12497	6.32385	8.36684	0.000590069	0.0481989
17055978	C7orf31	chromosome 7 open reading frame 31	-1.18849	5.77814	-8.35748	0.00059296	0.0481989
17012946	TNFAIP3	TNF alpha induced protein 3	1.09989	9.17522	8.35279	0.000594411	0.0481989
17092875	IFNE	interferon epsilon	1.2836	7.15147	8.3269	0.000602517	0.0487622
16665796	SGIP1	SH3GL interacting endocytic adaptor 1	1.16579	8.72996	8.29864	0.000611519	0.0493011
16674604	MR1	major histocompatibility complex, class I-related	1.1048	9.16549	8.25527	0.000625649	0.049681
16990294	PCDHB10	protocadherin beta 10	1.15288	4.9752	8.24071	0.00063048	0.049681
17016512	H2AC17	H2A clustered histone 17	-1.3379	6.0662	-8.23045	0.000633911	0.049681
16873087	KCNN4	potassium calcium-activated channel subfamily N member 4	1.73948	7.75042	8.21947	0.000637608	0.049681
17105393	TMEM35A	transmembrane protein 35A	1.12478	6.75559	8.18274	0.000650167	0.0498311
